# Supplementary material for: The Maya blue nanostructured material concept applied to colouring geopolymers
Source: Royal Society of Chemistry journal article supplement (doi:10.1039/c5ra14076e), 2015-01-01
Supplement: c5ra14076e1.pdf [file c5ra14076e1.pdf]

## Electronic Supplementary Information

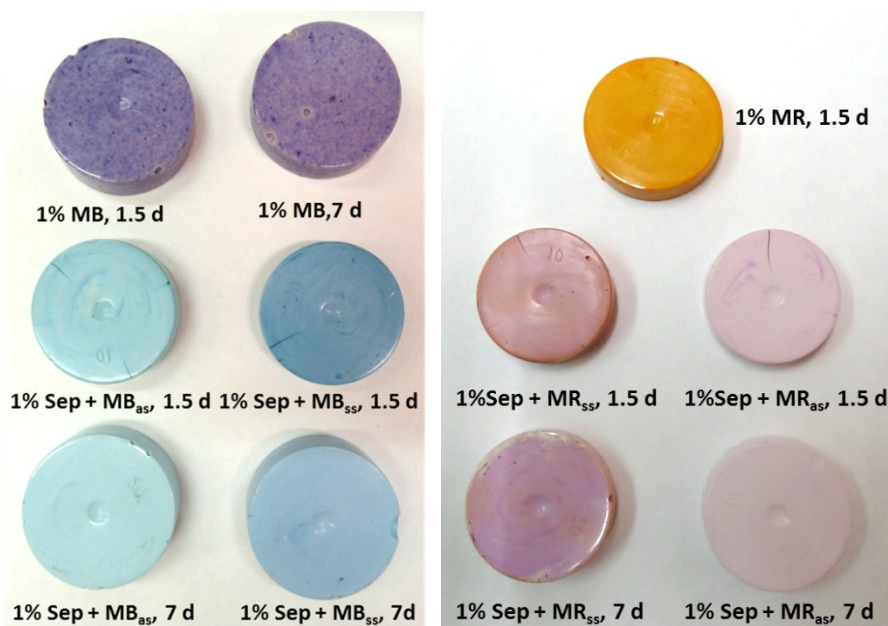

Supplementary Figure 1. Geopolymer (G) colored with not encapsulated dye (top row) and with sepiolite-dye composite pigments (middle and bottom rows) with the aqueous solution (left) and the solid state (right) method after 1.5 and 7 days. The left and right pictures are for MB and MR, respectively.

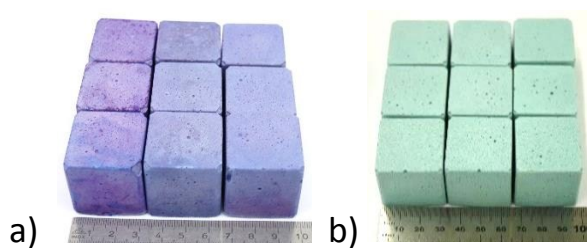

Supplementary Figure 2. Set of geopolymer left control, centre light UV test, pH 2 conditions, a) 0.5% MB, b) 1.2% sepiolite + MB<sub>as</sub> (equivalent to 0.2% MB)
